# Supplementary material
Source: Springer Nature journal article supplement (https://www.springermedizin.de/resource/supplementary/12880_2006_37_MOESM2_ESM.pdf/9450418)

Se:1  
Im:318

[A]

Study Date:3/6/2007  
Study Time:2:05:00 PM  
MRN:

[R]

[L]

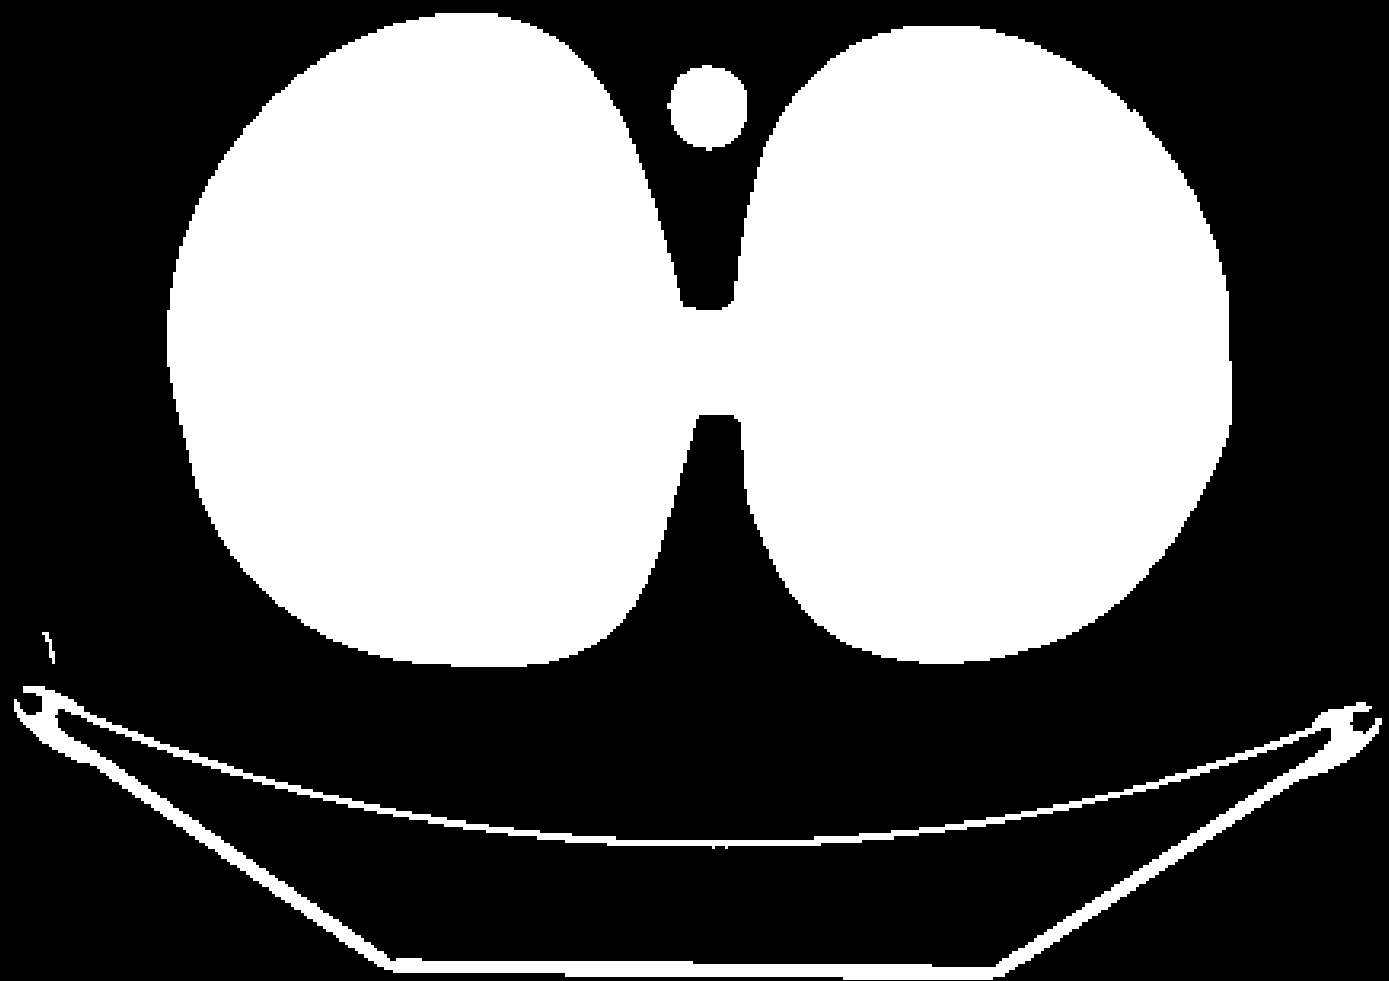

[P]

C-341  
W434

Supplement: MOESM2 [file 9450418]
